# Supplementary material for: Interactions of the primers and Mg2+with graphene quantum dots enhance PCR performance
Source: Royal Society of Chemistry journal article supplement (doi:10.1039/c5ra12729g), 2015-01-01
Supplement: c5ra12729g1.pdf [file c5ra12729g1.pdf]

## Supporting Information

### Interactions of the Primers and Mg<sup>2+</sup> with Graphene Quantum Dots Enhance PCR Performance

*Meidong Zhu, Chao Luo, Fangwei Zhang, Fei Liu, Jingyan Zhang, Shouwu Guo*

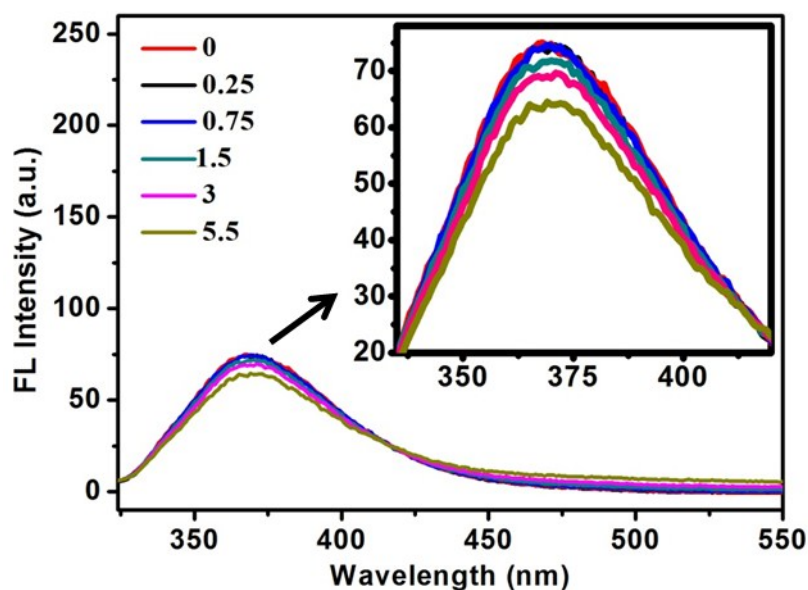

**Figure S1.** GQDs interact with double-stranded DNA weakly. GQDs (0, 0.25, 0.75, 1.5, 3, 5.5 ng/ $\mu$ L) quench barely the fluorescence of the 2-Ap labeled double-stranded DNA (5'-CGC TAA CGG 2ApTT CAC CAC-3', and 3'-GCG ATT GCCT AA GTG GTG-5', 25mM) at room temperature.

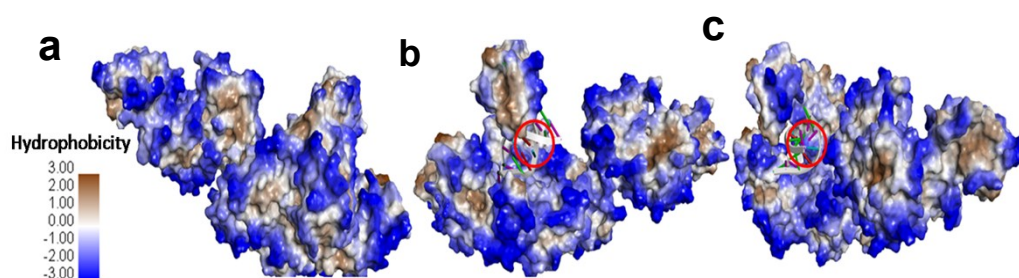

**Figure S2.** The distribution of hydrophobic areas on Taq polymerase surface. The hydrophobicity from blue zone to gray zone increase gradually. The area marked by a red circle is the active center of Taq polymerase. a, b, and c were the different perspectives of the structure of Taq polymerase.

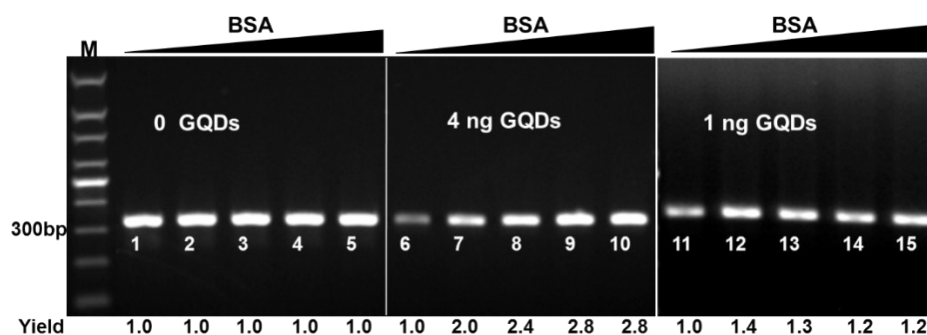

**Figure S3.** High concentration of BSA can reverse the suppression by excessive GQDs on PCR, but can not affect the optimization of GQDs. Each group contain 0, 0.08, 0.24, 0.40, 0.54  $\mu\text{g}/\mu\text{L}$  of BSA from left to right, respectively. Lanes 1-5, 6-10, 11-15 contain 0, 4, and 1 ng of GQDs, respectively. PCR product yield of the first lane in each case (lanes 1, 6 and 11) was taken as 1, the yield of others are relative to them, respectively. The template was PBR322 plasmid. PCR conditions are described in the experimental section.

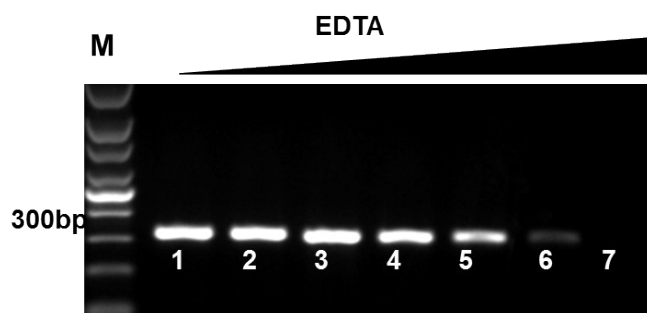

**Figure S4.** EDTA can inhibit PCR by chelating  $\text{Mg}^{2+}$ . Lanes 1-7 contain 0, 1, 1.2, 1.4, 1.6, 1.8 and 2 mM of EDTA, respectively. The  $\text{Mg}^{2+}$  was 2.5 mM. The template was PBR322 plasmid. PCR conditions are described in the experimental section.

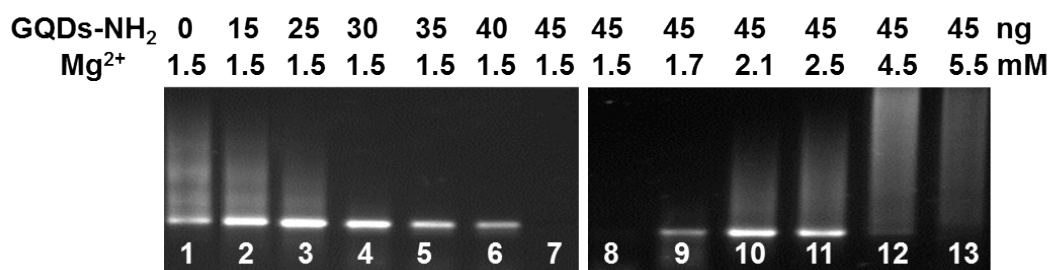

**Figure S5.** 30 ng of GQDs-NH<sub>2</sub> was needed to improve the specificity of round-2 PCR; and only 2.1 mM of  $\text{Mg}^{2+}$  was needed to reverse the suppression generated by GQDs-NH<sub>2</sub>. The template was PBR322 plasmid. PCR conditions are described in the experimental section.
